# Supplementary material for: Passive particle transport using a transversely propelling polymer “sweeper”
Source: Royal Society of Chemistry journal article supplement (doi:10.1039/d2sm01708c), 2023-01-01
Supplement: d2sm01708c2.pdf [file d2sm01708c2.pdf]

## Passive particle transport using a transversely propelling polymer “sweeper”: Supporting Information

K. R. Prathyusha<sup>1,\*</sup>

<sup>1</sup>*School of Chemical and Biomolecular Engineering,  
Georgia Institute of Technology, Atlanta, GA 30318, USA*  
(Dated: May 14, 2023)

### MOVIE DETAILS

Movie1.mp4 : The transversely propelling polymer collecting the passive particles. We use  $N = 20$ ,  $f_p = 25$ ,  $N_t = 1000$ .
